# Supplementary material for: Role of changes in SARS-CoV-2 spike protein in the interaction with the human ACE2 receptor: An in silico analysis
Source: PubMed Central journal article supplement (PMC7081066; doi:10.17179/excli2020-1167), 2020-03-18
Supplement: EXCLI-19-410-s-001.pdf [file EXCLI-19-410-s-001.pdf]

**Supplementary information to:**

**ROLE OF CHANGES IN SARS-COV-2 SPIKE PROTEIN IN THE INTERACTION WITH THE HUMAN ACE2 RECEPTOR: AN *IN SILICO* ANALYSIS**

Joseph Thomas Ortega<sup>1</sup>, Maria Luisa Serrano<sup>2</sup>, Flor Helene Pujol<sup>3</sup>, Hector Rafael Rangel<sup>3\*</sup>

1 Department of Pharmacology and Cleveland Center for Membrane and Structural Biology, School of Medicine, Case Western Reserve University, Cleveland, OH 44106, USA

2 Unidad de Química Medicinal, Facultad de Farmacia, Universidad Central de Venezuela, Caracas, Venezuela

3 Laboratorio de Virología Molecular, Centro de Microbiología y Biología Celular, Instituto Venezolano de Investigaciones Científicas, Caracas, Venezuela

\* **Corresponding author:** Hector Rafael Rangel, Laboratorio de Virología Molecular, Centro de Microbiología y Biología Celular, Instituto Venezolano de Investigaciones Científicas, Caracas, Venezuela; E-mail: [hrangel2006@gmail.com](mailto:hrangel2006@gmail.com)

<http://dx.doi.org/10.17179/excli2020-1167>

This is an Open Access article distributed under the terms of the Creative Commons Attribution License (<http://creativecommons.org/licenses/by/4.0/>).

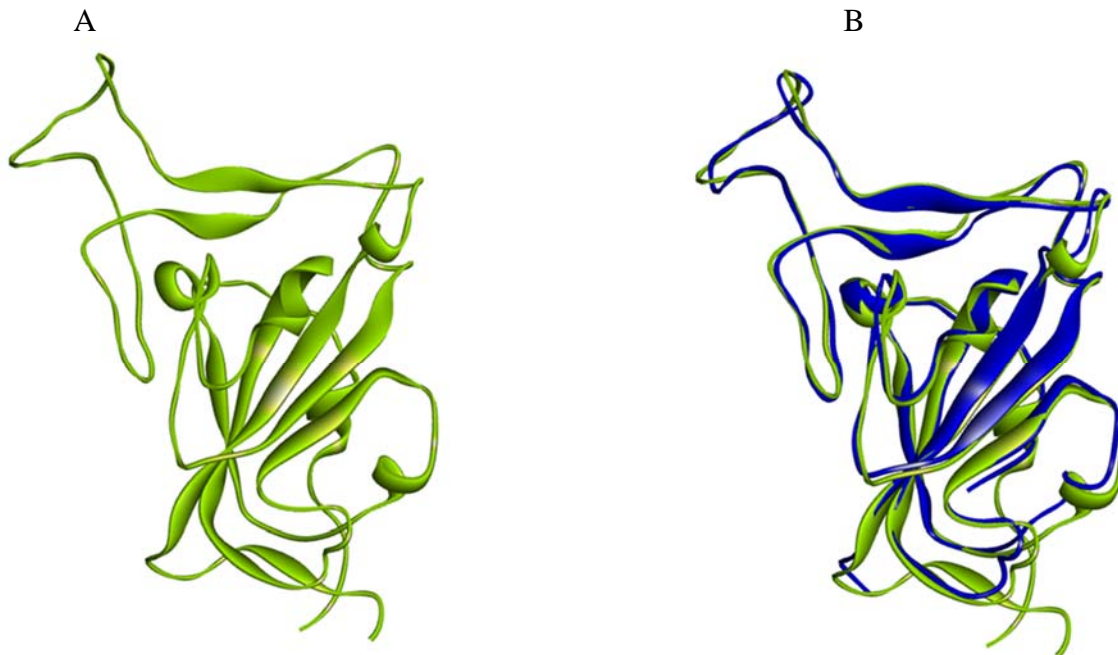

**Supplementary Figure 1:** Spike protein of *Rhinolophus sinicus* (A) and the merge between spike of *Rhinolophus sinicus* and SARS-CoV (B). The merge image shows a high level of structural similarity in both protein, suggesting a similar pattern of interaction with the receptor.
